# Supplementary material for: Machine learning of material properties: Predictive and interpretable multilinear models
Source: PubMed Central journal article supplement — Sci Adv. 2022 May 6;8(18):eabm7185. doi: 10.1126/sciadv.abm7185 (PMC9075804; doi:10.1126/sciadv.abm7185), 2022-05-06
Supplement: sciadv.abm7185_sm.pdf [file sciadv.abm7185_sm.pdf]

## Supplementary Materials for

### **Machine learning of material properties: Predictive and interpretable multilinear models**

Alice E. A. Allen\* and Alexandre Tkatchenko\*

\*Corresponding author. Email: [aliceeaallen@gmail.com](mailto:aliceeaallen@gmail.com) (A.E.A.A.); [alexandre.tkatchenko@uni.lu](mailto:alexandre.tkatchenko@uni.lu) (A.T.)

Published 6 May 2022, *Sci. Adv.* **8**, eabm7185 (2022)  
DOI: [10.1126/sciadv.abm7185](https://doi.org/10.1126/sciadv.abm7185)

#### **This PDF file includes:**

Figs. S1 to S5

**Fig. S1. The convergence of the H-statistics.**

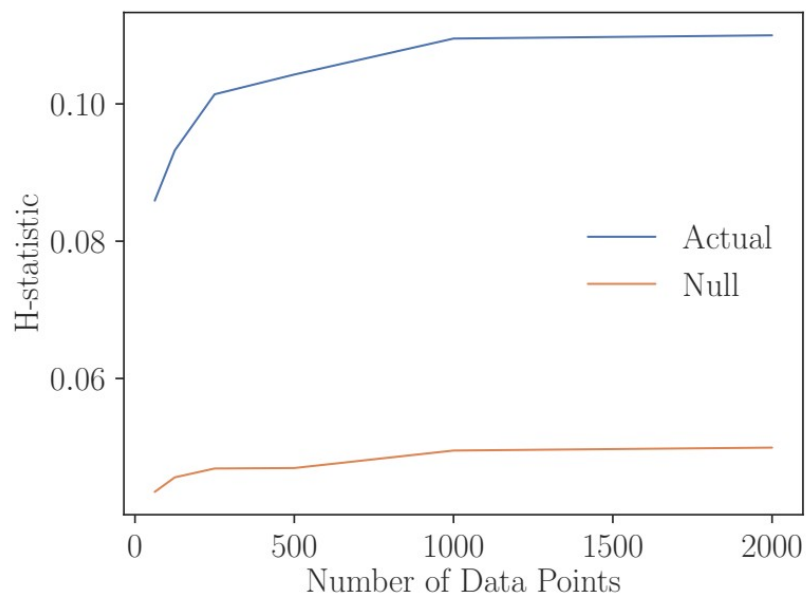

Figure S1: The convergence of the H-statistic with the number of data-points for the KRR model for the formation energy.

Fig. S2. The 2-gram interactions for the KRR model for TCOs.

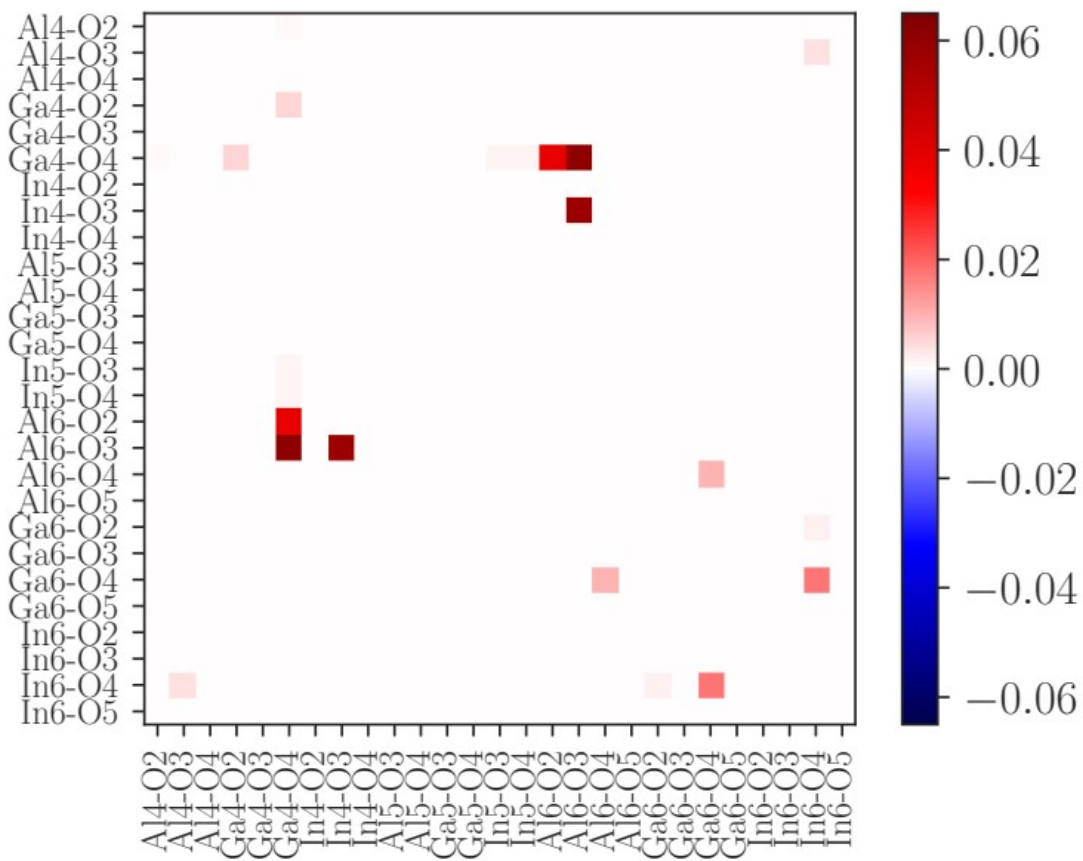

Figure S2: The interactions present for the 2-gram features for the 4-gram formation energy kernel ridge regression model.

**Fig. S3. Analysis of the coefficients of the TCOs linear model.** Figure S3: The top 50 coefficients for prediction of the a) formation energy and b) bandgap for TCOs. The variation across an ensemble of 10 linear models, fit from bootstrapped data, is shown. Part c) shows the coefficients that are both in the top 50 formation energies and top 50 bandgap energies and part d) shows the relationship between the concentration of O5 and the bandgap energy.

a)

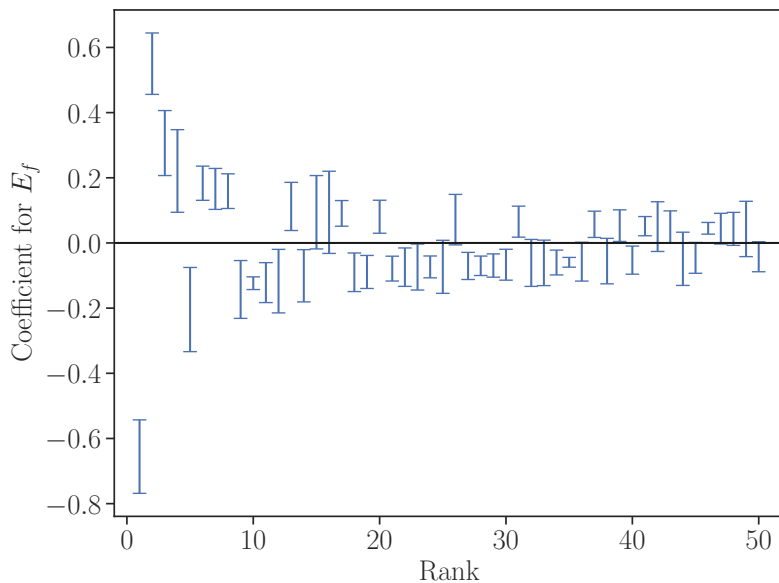

b)

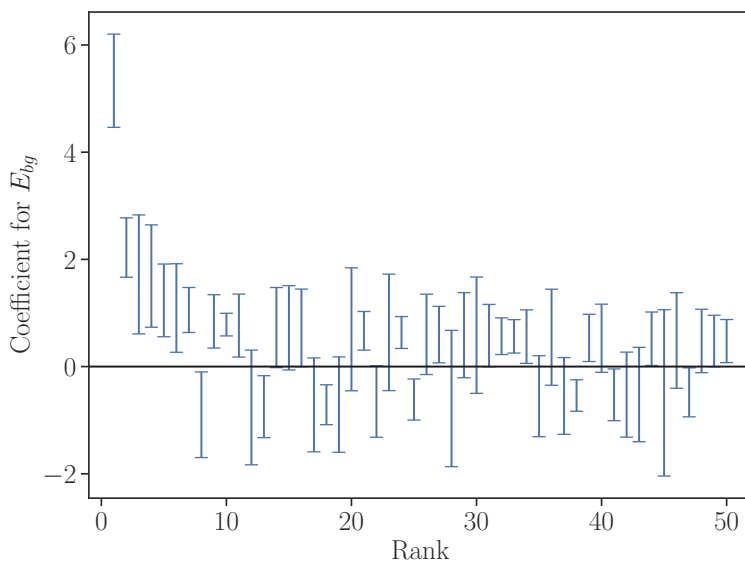

c)

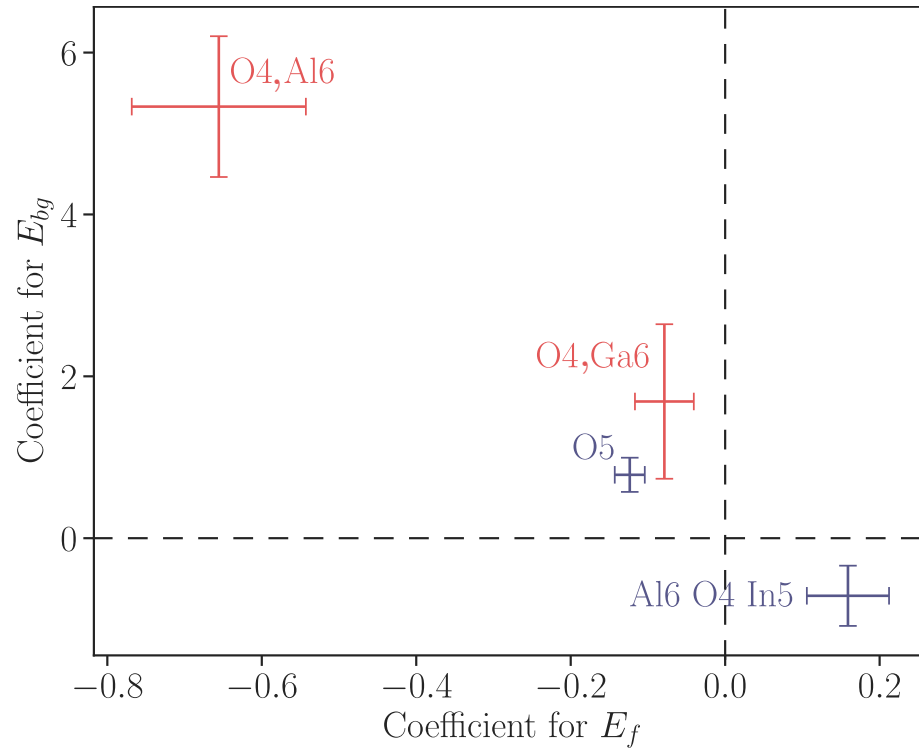

d)

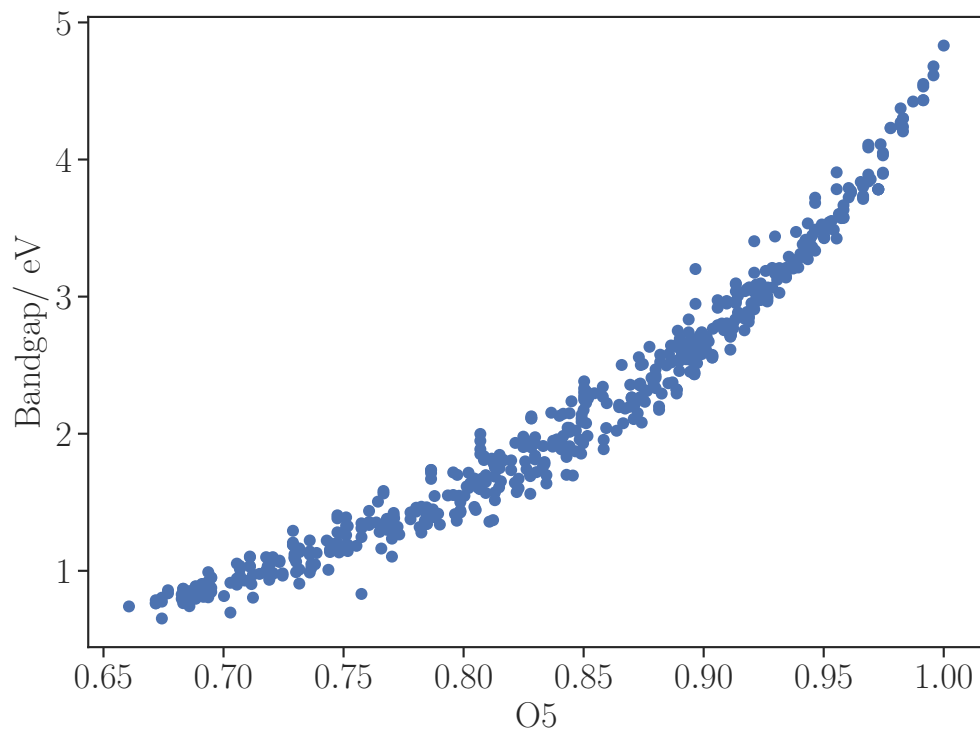

Fig. S4. The coefficients for the elpasolite linear model.

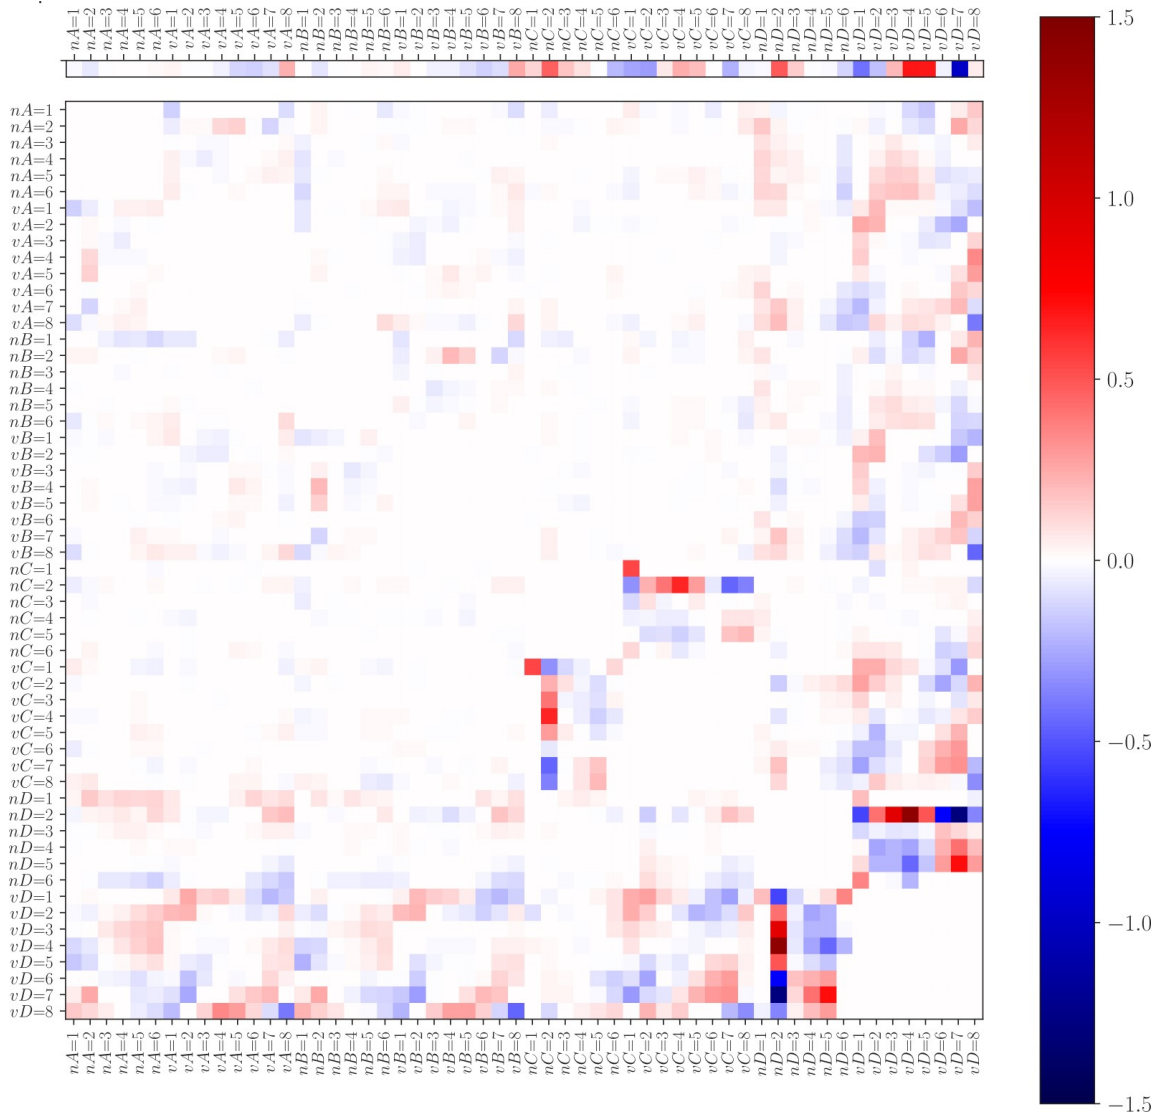

Figure S4. The coefficients for the individual variables and pairwise interaction terms for the trilinear model.

**Fig. S5. Algorithms for exploring the elpasolite universe.**

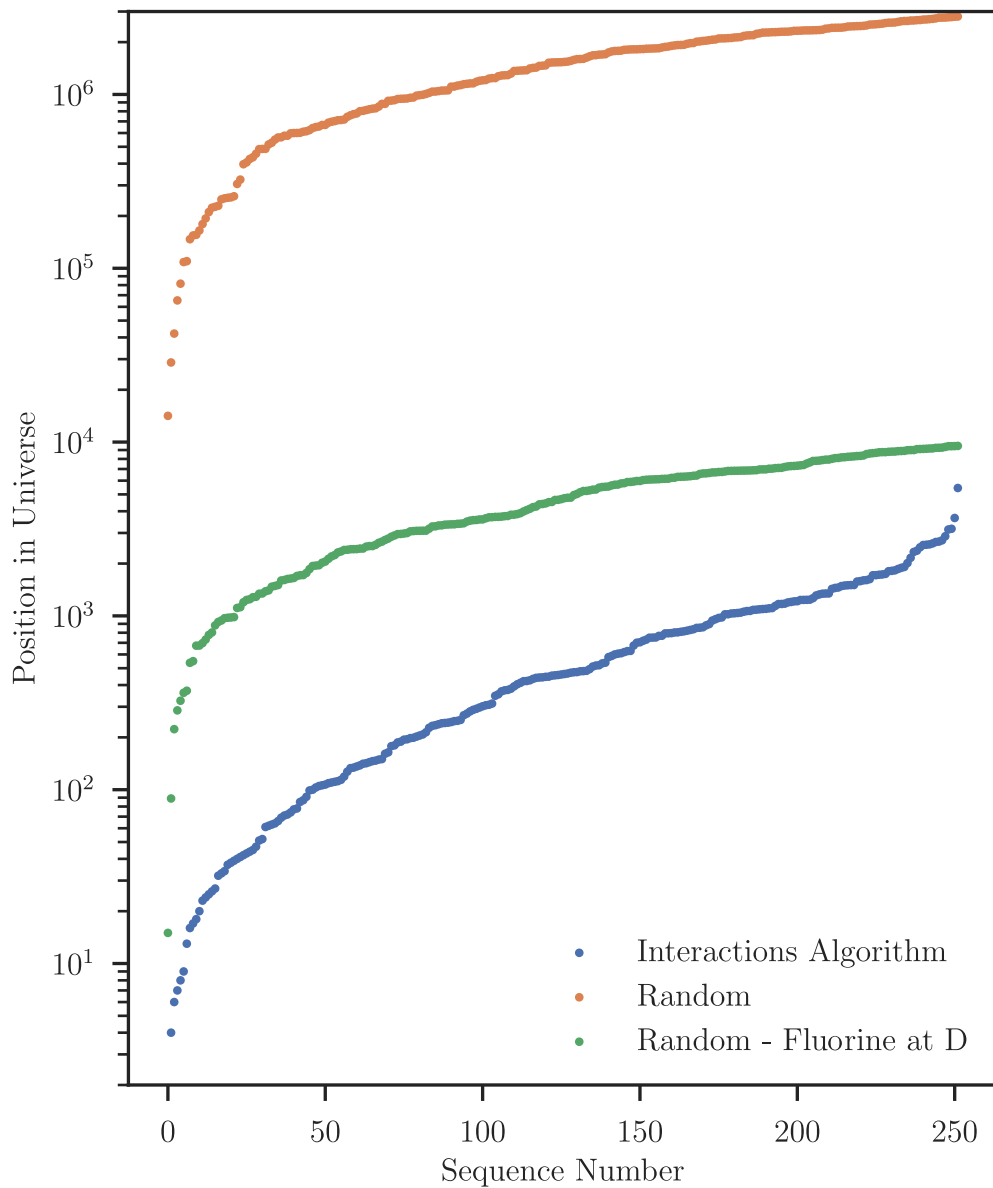

Figure S5. The position in the elpasolite universe of sequences from three different methods. The interaction algorithm uses three variable contributions to find low energy structures. The positions if the structures are randomly chosen are shown as are the positions if the structures are randomly chosen but restricted to having fluorine at D.
